# Supplementary material for: High-resolution in situ photo-irradiation MAS NMR: application to the UV-polymerization of n -butyl acrylate
Source: Royal Society of Chemistry journal article supplement (doi:10.1039/d4ta06729k), 2024-12-02
Supplement: d4ta06729k1.pdf [file d4ta06729k1.pdf]

## Supplementary information for “High-resolution in-situ photo-irradiation MAS NMR: Application to the UV-polymerization of n-butyl acrylate”

Thomas J. N. Hooper,\* Rodrigo de Oliveira-Silva, Dimitrios Sakellariou

Centre for Membrane Separations, Adsorption, Catalysis and Spectroscopy for Sustainable Solutions (cMACS), KU Leuven, Leuven 3001, Belgium

### Solid-state NMR experimental details

The bespoke system was demonstrated on an Oxford wide-bore 11.7 T magnet controlled by a Bruker Avance spectrometer and a Varian MAS control system. All spectra were processed using the Topspin software package and referenced to the unified scale using IUPAC recommended frequency ratios relative to the  $^{13}\text{C}$  adamantane(s) methylene resonance ( $\delta = 37.77$  ppm).<sup>1,2</sup> The  $^1\text{H}$  NMR ( $\nu_0 = 499.80$  MHz) one-pulse experiments were acquired with a  $\pi/2$  pulse of  $5.65 \mu\text{s}$  (determined on adamantane(s)) and recycle delays of 20 s. The  $^1\text{H}$   $T_1$  relaxation measurements were performed via saturation recovery experiments with a 200 pulse saturation train. The  $^{13}\text{C}$  ( $\nu_0 = 125.68$  MHz) decoupled one-pulse experiments were acquired with a  $\pi/2$  pulse of  $5.25 \mu\text{s}$  (determined on adamantane(s)), high power proton decoupling, and recycle delays of 15 s. The  $^{79}\text{Br}$  ( $\nu_0 = 125.23$  MHz) one-pulse experiments were acquired with a  $\pi/2$  pulse of  $4 \mu\text{s}$  (determined on  $\text{KBr(s)}$ ) and recycle delays of 0.5 s.

### Light-irradiation equipment

The bespoke system utilized the following Thorlabs equipment: USB LED driver (UPLD); 3 m long custom high-OH multi-mode SMA to flat-cleave 0.4 mm diameter fiber optic cable (FT200UMT); and 365 nm mid-power fiber-coupled LED (M365FP1). The USB LED driver allows driver current control from 0 – 1200 mA resulting in a linearly related output power of 0 – 13.3 mW at the output of the fiber optic. Photometer power measurements were performed to ensure the linearity of the current/power relationship. Fiber-coupled LEDs with alternative wavelengths or higher powers can be easily interchanged for future experiments.

### Monomer conversion simulation parameters

Table S1. Parameters for the calculation of the polymerization reaction curves (Figure 5(a)) at different radiant powers using the mechanistically derived analytical equation 3 from K.V.K. Boodhoo, *et al.*<sup>3</sup>

| Parameter                             | Symbol (units)                                | Value                   | Source                   |
|---------------------------------------|-----------------------------------------------|-------------------------|--------------------------|
| polymerization propagation rate       | $k_p$ ( $\text{Lmol}^{-1}\text{s}^{-1}$ )     | $1.63 \times 10^4$      | literature <sup>4</sup>  |
| termination rate                      | $k_t$ ( $\text{Lmol}^{-1}\text{s}^{-1}$ )     | $6 \times 10^7$         | literature <sup>4</sup>  |
| average thin film thickness           | $L$ (cm)                                      | 0.05                    | measurement <sup>a</sup> |
| sample surface area                   | $S$ ( $\text{cm}^2$ )                         | 1.5                     | measurement <sup>a</sup> |
| initial photo-initiator concentration | $P_0$ ( $\text{molL}^{-1}$ )                  | 0.02                    | measurement              |
| quantum yield of initiation           | $\phi$                                        | 0.6                     | literature <sup>5</sup>  |
| absorption coefficient                | $\alpha$ ( $\text{Lmol}^{-1}\text{cm}^{-1}$ ) | 215                     | literature <sup>6</sup>  |
| wavelength                            | $\lambda$ (m)                                 | $365 \times 10^{-9}$    | measurement              |
| speed of light                        | $c$ ( $\text{ms}^{-1}$ )                      | $2.998 \times 10^8$     |                          |
| Avogadro's constant                   | $N_a$ ( $\text{mol}^{-1}$ )                   | $6.022 \times 10^{23}$  |                          |
| Planks constant                       | $h$ (Js)                                      | $6.626 \times 10^{-34}$ |                          |
| incident light power                  | $I$ (mW)                                      | 13.3; 6.7; 3.3; 1.7     | measurement <sup>b</sup> |

<sup>a</sup> Calculated by modelling the tapered glass rod as a perfect cone.

<sup>b</sup> Calculated by assuming that 100 % of the fiber optic radiant power is incident on the sample

## Additional static $^1\text{H}$ NMR spectra

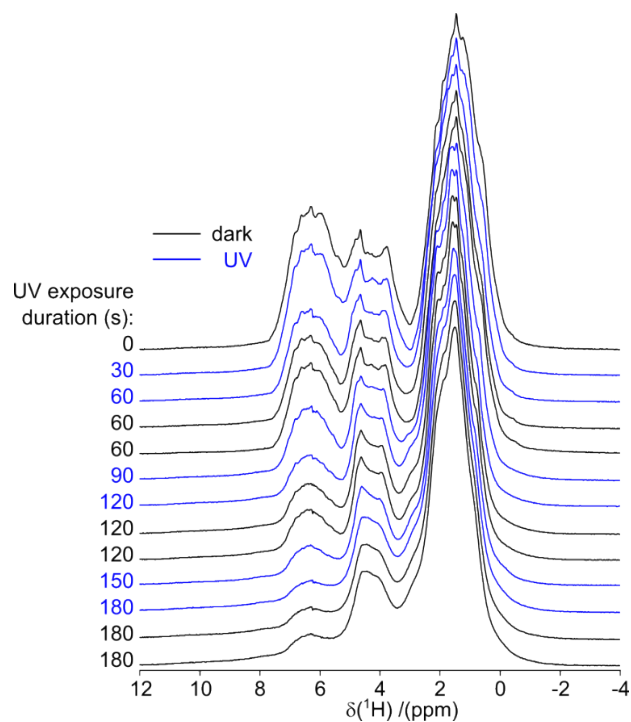

Figure S1. Static  $^1\text{H}$  NMR spectra of *n*BA polymerization after variable durations of UV exposure (365 nm at 13.3 mW fiber optic output power). Black spectra were taken under dark conditions pre/post UV exposure, while blue lines were taken while under irradiation. Post-UV exposure spectra under dark conditions are very similar to the spectra taken under UV irradiation just before the light is turned off. This demonstrates that the reaction terminates rapidly once the UV irradiation is stopped.

## REFERENCES

- 1 R. K. Harris, E. D. Becker, S. M. Cabral de Menezes, P. Granger, R. E. Hoffman and K. W. Zilm, *Pure and Applied Chemistry*, 2008, **80**, 59–84.
- 2 R. K. Harris, E. D. Becker, S. M. Cabral De Menezes, R. Goodfellow and P. Granger, *Concepts in Magnetic Resonance*, 2002, **14**, 326–346.
- 3 K. V. K. Boodhoo, W. a. E. Dunk, M. S. Jassim and R. J. Jachuck, *Journal of Applied Polymer Science*, 2004, **91**, 2079–2095.
- 4 S. Beuermann, D. A. Paquet, J. H. McMinn and R. A. Hutchinson, *Macromolecules*, 1996, **29**, 4206–4215.
- 5 M. D. Goodner and C. N. Bowman, in *Solvent-Free Polymerizations and Processes*, American Chemical Society, 1999, vol. 713, pp. 220–231.
- 6 M. G. Joshi, *Journal of Applied Polymer Science*, 1981, **26**, 3945–3946.
